# Supplementary material for: Hierarchical CuCo2O4nanowire@NiCo2O4nanosheet core/shell arrays for high-performance supercapacitors
Source: Royal Society of Chemistry journal article supplement (doi:10.1039/c5ra11007f), 2015-01-01
Supplement: c5ra11007f1.pdf [file c5ra11007f1.pdf]

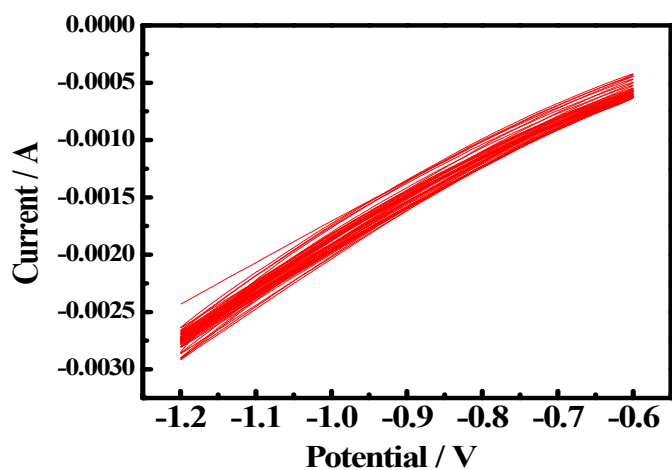

Figure S1. The CVs of the electrodeposition.

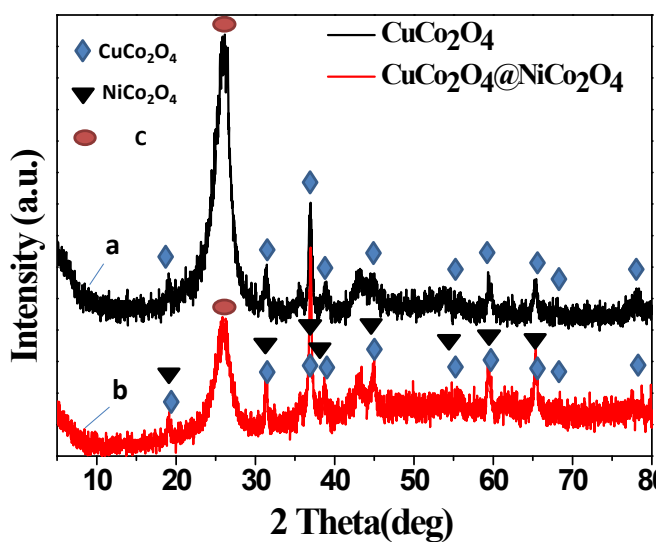

Figure S2. XRD patterns of (a) the bare  $\text{CuCo}_2\text{O}_4$  electrode and (b) the  $\text{CuCo}_2\text{O}_4@/\text{NiCo}_2\text{O}_4$  hybrid electrode.

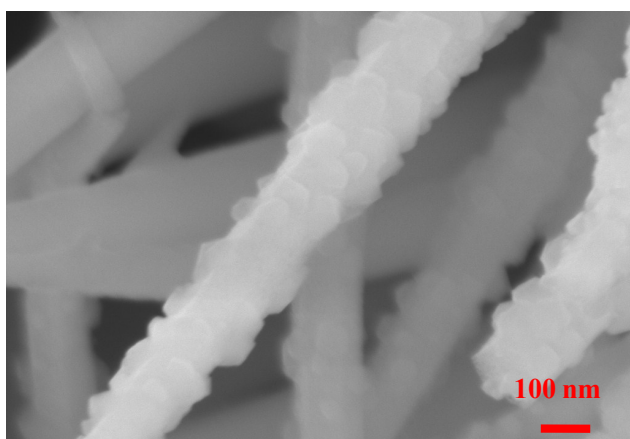

Figure S3. SEM image after the electrodeposition.

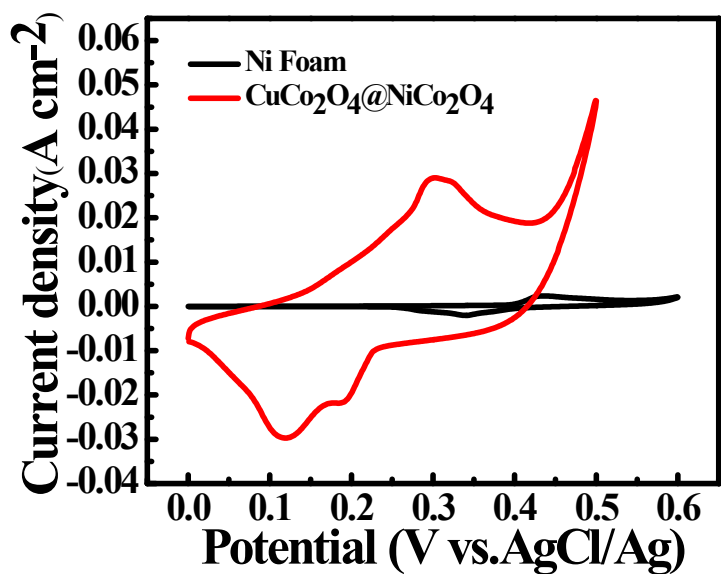

Figure S4. CV curves of the Ni foam and CuCo<sub>2</sub>O<sub>4</sub>@NiCo<sub>2</sub>O<sub>4</sub> hybrid electrodes at a scan rate of 5 mV s<sup>-1</sup>.

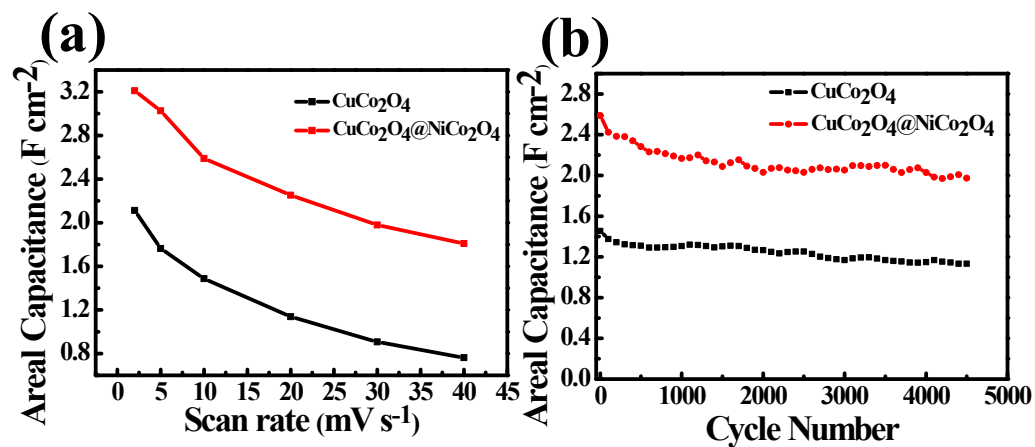

Figure S5. (a) Areal capacitances of CuCo<sub>2</sub>O<sub>4</sub> and CuCo<sub>2</sub>O<sub>4</sub>@NiCo<sub>2</sub>O<sub>4</sub> hybrid electrodes at different current densities. (b) Long-term cycling stability of CuCo<sub>2</sub>O<sub>4</sub> and CuCo<sub>2</sub>O<sub>4</sub>@NiCo<sub>2</sub>O<sub>4</sub> hybrid electrodes at a current density of 10 mA cm<sup>-2</sup>.
